# Supplementary material for: Calcineurin-Responsive Transcription Factor CgCrzA Is Required for Cell Wall Integrity and Infection-Related Morphogenesis in Colletotrichum gloeosporioides
Source: PubMed Central journal article supplement — Plant Pathol J. 2020 Oct 1;36(5):385–97. doi: 10.5423/PPJ.OA.04.2020.0071 (PMC7542025; doi:10.5423/ppj.oa.04.2020.0071), 2020-10-01
Supplement: PPJ-36-385_Supple.pdf [file PPJ-36-385_Supple.pdf]

**Supplementary Table 1.** Primers used in this study

| Primer        | Sequence (5'-3')                                                               | Application                                                        |
|---------------|--------------------------------------------------------------------------------|--------------------------------------------------------------------|
| CRZA-1F       | CTAGCTGTCGCGTCCTGATC                                                           | For amplification of 5' flank region of <i>CgCRZA</i>              |
| CRZA-2R       | CCTCCACTAGCTCCAGCCAAGCCGTCGGTAGTCGGAAGGATG                                     |                                                                    |
| CRZA-3F       | GTTGGTGTGCGATGTCAGCTCCGGAGGGTACACGGCAGGTTGCTG                                  | For amplification of 3' flank region of <i>CgCRZA</i>              |
| CRZA-4R       | GGGTCTGGTAGAGACCTTG                                                            |                                                                    |
| CRZA-probe-1F | GTAGCAGCAGAGGATCAGAAG                                                          | For southern blotting analysis                                     |
| CRZA-probe-2R | GTCGGTAGTCGGAAGGATG                                                            |                                                                    |
| HPH-F         | GGCTTGGCTGGAGCTAGTGGAGG                                                        | For amplification of hygromycin B phosphotransferase gene cassette |
| HPH-R         | CTCCGGAGCTGACATCGACACCAAC                                                      |                                                                    |
| CRZA-GFP-1F   | ACTCACTATAGGGCGAATTGGTACTCAAATTGGTTGATTTACG-                                   | For <i>CgCRZA</i> -GFP fusion construct                            |
| CRZA-GFP-2R   | GTTCTGGGCTTGCAAG<br>CACCACCCCGGTGAACAGCTCCTCGCCCTTGCTCACCCGACCGC-<br>CGTAGTCGC |                                                                    |
| 18S-1F        | GTGAGGCCCTCAAAGGTAGTGG                                                         | For qRT-PCR analysis of house-keeping gene                         |
| 18S-2R        | GGATCCCAGTGCAGACGT                                                             |                                                                    |
| CHS1-1F       | CCGTAAGTGGTCTGGTCTGTTT                                                         | For qRT-PCR analysis of <i>CHS1</i>                                |
| CHS1-2R       | GAACCACAGGAAACCGAAGA                                                           |                                                                    |
| CHS2-1F       | TTCCTGCAGCTCATGTTTAC                                                           | For qRT-PCR analysis of <i>CHS2</i>                                |
| CHS2-2R       | CTGTAGGCGATCATGCTGAA                                                           |                                                                    |
| CHS3-1F       | GTCTTGCTGGTGCTTTCTC                                                            | For qRT-PCR analysis of <i>CHS3</i>                                |
| CHS3-2R       | GGTGTGCGGAACATCAGTCT                                                           |                                                                    |
| CHS4-1F       | TCACCAGAGCCTTCCAGTCT                                                           | For qRT-PCR analysis of <i>CHS4</i>                                |
| CHS4-2R       | CAAGACGACTGCCAGAATGA                                                           |                                                                    |
| CHS5-1F       | CGTCAGCATGAGTTGGATAA                                                           | For qRT-PCR analysis of <i>CHS5</i>                                |
| CHS5-2R       | GGCTGGAGCTCATCAAAGAC                                                           |                                                                    |
| CHS6-1F       | TGACTCTTGCCAGAATGC                                                             | For qRT-PCR analysis of <i>CHS6</i>                                |
| CHS6-2R       | GAAGACCTTGCCCATGTTGT                                                           |                                                                    |
| CHS7-1F       | GCAGAAGACTCTCCGGTCAC                                                           | For qRT-PCR analysis of <i>CHS7</i>                                |
| CHS7-2R       | CTCTGCTGTGCCATTTTCGTA                                                          |                                                                    |
| PKS-1F        | ACCGCGACTTCAGCGACTG                                                            | For qRT-PCR analysis of <i>PKS</i>                                 |
| PKS-2R        | GGAGCCTTGACGGCAGCAG                                                            |                                                                    |
| SCD-1F        | CGACTCCTACGACTCCAAGG                                                           | For qRT-PCR analysis of <i>SCD</i>                                 |
| SCD-2R        | TGAGATTGGTCGTCGTCCTC                                                           |                                                                    |
| 3HNR-1F       | GTTCCAAGTACGACCGCATT                                                           | For qRT-PCR analysis of <i>3HNR</i>                                |
| 3HNR-2R       | GGCGTAGTTGACGATGACCT                                                           |                                                                    |
| 4NHR-1F       | AAGACCGACATGTACGACGA                                                           | For qRT-PCR analysis of <i>4NHR</i>                                |
| 4NHR-2R       | GGTGACCTTGATAACTTG                                                             |                                                                    |

qRT-PCR, quantitative real-time PCR.

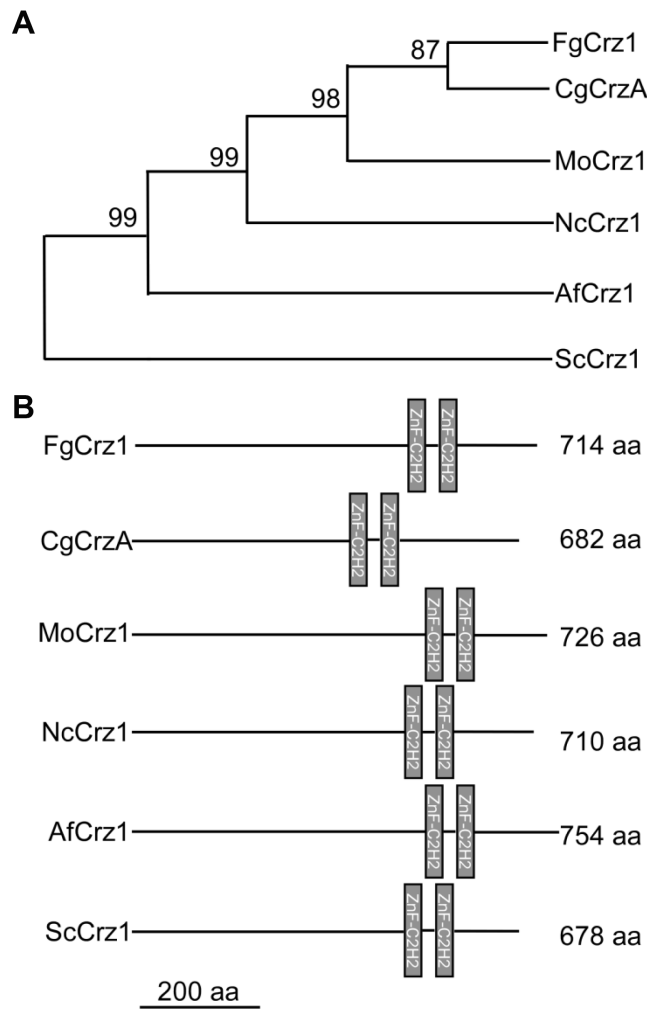

**Supplementary Fig. 1.** Phylogenetic tree and structural analysis of CgCrzA and its homologues. (A) Phylogenetic tree generated using Mega 5.0 program with neighbor-joining method. Bootstrap values (1,000 replications) are given at nodes. (B) Structural analysis of CgCrzA and its homologues from *Fusarium graminearum* (FgCrz1), *Magnaporthe oryzae* (MoCrz1), *Neurospora crassa* (NcCrz1), *Aspergillus fumigatus* (AfCrz1) and *Saccharomyces cerevisiae* (ScCrz1). Zinc finger domains (C<sub>2</sub>H<sub>2</sub> zinc finger DNA-binding domain, IPRO007087) were indicated by gray boxes.
